# Supplementary material for: Fault Detection and Classification of a Photovoltaic Generator Using the BES Optimization Algorithm Associated with SVM
Source: Hindawi journal article supplement (doi:10.1155/2022/6841861), 2022-11-08
Supplement: f1 [file 6841861.f1.docx]

| iph | isd | Rs | Rsh | functioning |
| --- | --- | --- | --- | --- |
| 7.364916 | 3.625253e-07 | 0.01774635 | 267.1035 | healthy |
| 7.364916 | 3.625253e-07 | 0.01774635 | 267.1035 | healthy |
| 7.359871 | 3.623038e-07 | 0.01832716 | 278.227 | healthy |
| 7.360537 | 3.622183e-07 | 0.018274 | 269.7748 | healthy |
| 7.359353 | 3.62903e-07 | 0.01826826 | 323.595 | healthy |
| 7.359353 | 3.62903e-07 | 0.01826826 | 323.595 | healthy |
| 7.360644 | 3.629221e-07 | 0.01824762 | 318.7953 | healthy |
| 7.360267 | 3.628466e-07 | 0.0181375 | 312.7941 | healthy |
| 7.362738 | 3.627169e-07 | 0.01821812 | 293.0584 | healthy |
| 7.361438 | 3.626704e-07 | 0.01820138 | 294.8229 | healthy |
| 7.361184 | 3.626952e-07 | 0.01813034 | 296.8129 | healthy |
| 7.359871 | 3.623038e-07 | 0.01832716 | 278.227 | healthy |
| 7.361438 | 3.626704e-07 | 0.01820138 | 294.8229 | healthy |
| 7.361184 | 3.626952e-07 | 0.01813034 | 296.8129 | healthy |
| 7.363525 | 3.626412e-07 | 0.01829407 | 285.3939 | healthy |
| 7.361467 | 3.626204e-07 | 0.01829019 | 291.8219 | healthy |
| 7.361484 | 3.626238e-07 | 0.01823691 | 291.4321 | healthy |
| 7.363841 | 3.625975e-07 | 0.01832317 | 281.7782 | healthy |
| 7.36266 | 3.624319e-07 | 0.01825743 | 274.7038 | healthy |
| 7.364304 | 3.623709e-07 | 0.01850737 | 267.742 | healthy |
| 7.363511 | 3.623332e-07 | 0.01811479 | 264.1109 | healthy |
| 7.363341 | 3.623628e-07 | 0.01851339 | 270.2977 | healthy |
| 7.363444 | 3.622943e-07 | 0.01825233 | 263.4434 | healthy |
| 7.364572 | 3.622394e-07 | 0.01820677 | 256.3243 | healthy |
| 7.364122 | 3.621673e-07 | 0.01833691 | 255.086 | healthy |
| 7.364534 | 3.622218e-07 | 0.01820238 | 255.3994 | healthy |
| 7.365027 | 3.621932e-07 | 0.01830148 | 253.4473 | healthy |
| 7.365605 | 3.621403e-07 | 0.01821862 | 248.0928 | healthy |
| 7.365803 | 3.620692e-07 | 0.01848226 | 246.3696 | healthy |
| 7.365427 | 3.621061e-07 | 0.0183786 | 247.9171 | healthy |
| 7.365448 | 3.620923e-07 | 0.01851143 | 247.8374 | healthy |
| 7.365753 | 3.620613e-07 | 0.01852899 | 245.9938 | healthy |
| 7.364823 | 3.620212e-07 | 0.0186118 | 248.0343 | healthy |
| 7.364925 | 3.620178e-07 | 0.01868715 | 248.2177 | healthy |
| 7.364949 | 3.620104e-07 | 0.0186904 | 247.9895 | healthy |
| 7.364922 | 3.619556e-07 | 0.01868825 | 244.078 | healthy |
| 7.364568 | 3.620562e-07 | 0.01880008 | 251.172 | healthy |
| 7.364301 | 3.620354e-07 | 0.01884892 | 251.5219 | healthy |
| 7.363718 | 3.620937e-07 | 0.01893622 | 257.0838 | healthy |
| 7.363188 | 3.620943e-07 | 0.01894735 | 259.1522 | healthy |
| 7.363358 | 3.620015e-07 | 0.0189701 | 253.7032 | healthy |
| 7.362646 | 3.620927e-07 | 0.01889164 | 260.3374 | healthy |
| 7.362056 | 3.62186e-07 | 0.01904171 | 269.1708 | healthy |
| 7.361529 | 3.622085e-07 | 0.01910236 | 273.2425 | healthy |
| 7.361453 | 3.622262e-07 | 0.01891446 | 272.5044 | healthy |
| 7.361052 | 3.622718e-07 | 0.01905234 | 278.7294 | healthy |
| 7.360956 | 3.622275e-07 | 0.01898566 | 274.6424 | healthy |
| 7.360411 | 3.622749e-07 | 0.01899864 | 280.5174 | healthy |
| 7.360367 | 3.622837e-07 | 0.01892269 | 280.0913 | healthy |
| 7.359601 | 3.623769e-07 | 0.01894992 | 289.5194 | healthy |
| 7.359891 | 3.623186e-07 | 0.01894844 | 284.3531 | healthy |
| 7.360024 | 3.623075e-07 | 0.01874323 | 280.8576 | healthy |
| 7.360444 | 3.622357e-07 | 0.01873166 | 274.6847 | healthy |
| 7.360887 | 3.62171e-07 | 0.01862754 | 268.412 | healthy |
| 7.360482 | 3.622315e-07 | 0.01851805 | 272.1654 | healthy |
| 7.360323 | 3.622619e-07 | 0.01848469 | 273.7559 | healthy |
| 7.360676 | 3.622154e-07 | 0.01828963 | 268.4192 | healthy |
| 7.360537 | 3.622183e-07 | 0.018274 | 269.7748 | healthy |
| 7.359871 | 3.623038e-07 | 0.01832716 | 278.227 | healthy |
| 7.359798 | 3.623167e-07 | 0.01824838 | 278.6554 | healthy |
| 7.360397 | 3.622386e-07 | 0.01810864 | 270.3109 | healthy |
| 7.359358 | 3.623859e-07 | 0.01817918 | 283.889 | healthy |
| 7.360345 | 3.622638e-07 | 0.0179288 | 270.1118 | healthy |
| 7.359155 | 3.625073e-07 | 0.01816583 | 293.7872 | healthy |
| 7.359462 | 3.624316e-07 | 0.01814169 | 288.6551 | healthy |
| 7.359798 | 3.623525e-07 | 0.01805737 | 279.9464 | healthy |
| 7.359477 | 3.623941e-07 | 0.01795124 | 283.4668 | healthy |
| 7.358302 | 3.625924e-07 | 0.01785957 | 300.3526 | healthy |
| 7.359297 | 3.62506e-07 | 0.01775518 | 289.2077 | healthy |
| 7.359287 | 3.625074e-07 | 0.0177211 | 290.0945 | healthy |
| 7.359979 | 3.624424e-07 | 0.01765335 | 281.9632 | healthy |
| 7.359197 | 3.62431e-07 | 0.01757437 | 283.8251 | healthy |
| 7.359417 | 3.625288e-07 | 0.01757048 | 288.5623 | healthy |
| 7.358342 | 3.625169e-07 | 0.01742069 | 292.1797 | healthy |
| 7.358528 | 3.626044e-07 | 0.0174045 | 297.865 | healthy |
| 7.358407 | 3.626347e-07 | 0.01735822 | 299.0627 | healthy |
| 7.357857 | 3.626789e-07 | 0.01746589 | 307.5547 | healthy |
| 7.357737 | 3.626884e-07 | 0.01740429 | 307.5756 | healthy |
| 7.357733 | 3.627378e-07 | 0.01733729 | 312.2556 | healthy |
| 7.357524 | 3.627661e-07 | 0.01727242 | 314.8511 | healthy |
| 7.357524 | 3.627661e-07 | 0.01727242 | 314.851 | healthy |
| 7.357324 | 3.627678e-07 | 0.01720145 | 313.3258 | healthy |
| 7.357406 | 3.626401e-07 | 0.01706962 | 303.3721 | healthy |
| 7.357281 | 3.627528e-07 | 0.01699318 | 312.0854 | healthy |
| 7.357284 | 3.627444e-07 | 0.01708284 | 313.7377 | healthy |
| 7.357692 | 3.62671e-07 | 0.01695641 | 304.8793 | healthy |
| 7.357963 | 3.626388e-07 | 0.01691063 | 300.5706 | healthy |
| 7.357342 | 3.627203e-07 | 0.01689639 | 310.2719 | healthy |
| 7.357934 | 3.626402e-07 | 0.0168294 | 300.0831 | healthy |
| 7.357878 | 3.62612e-07 | 0.01688192 | 300.7611 | healthy |
| 7.357229 | 3.62704e-07 | 0.01697256 | 311.6174 | healthy |
| 7.357035 | 3.627302e-07 | 0.01717411 | 320.2162 | healthy |
| 7.357028 | 3.627504e-07 | 0.0171406 | 320.3355 | healthy |
| 7.356755 | 3.627559e-07 | 0.01736104 | 325.3278 | healthy |
| 7.357416 | 3.627125e-07 | 0.01722071 | 314.7613 | healthy |
| 7.356997 | 3.626664e-07 | 0.01735349 | 317.2469 | healthy |
| 7.35729 | 3.626982e-07 | 0.01747965 | 317.9322 | healthy |
| 7.357395 | 3.626446e-07 | 0.01758018 | 315.7395 | healthy |
| 7.357775 | 3.625598e-07 | 0.01764304 | 306.2591 | healthy |
| 7.35758 | 3.625845e-07 | 0.01778205 | 309.4563 | healthy |
| 7.35714 | 3.626704e-07 | 0.01778836 | 317.2472 | healthy |
| 7.357061 | 3.627367e-07 | 0.01803752 | 325.5529 | healthy |
| 7.357061 | 3.627367e-07 | 0.01803752 | 325.5529 | healthy |
| 7.356971 | 3.627666e-07 | 0.01809125 | 327.1772 | healthy |
| 7.356721 | 3.627887e-07 | 0.01799861 | 323.7044 | healthy |
| 7.356499 | 3.629059e-07 | 0.01800717 | 334.412 | healthy |
| 7.356385 | 3.62834e-07 | 0.01783267 | 324.2599 | healthy |
| 7.356223 | 3.629388e-07 | 0.01800541 | 337.3449 | healthy |
| 7.356581 | 3.628421e-07 | 0.01799507 | 328.542 | healthy |
| 7.35202 | 3.626744e-07 | 0.02346456 | 44.59141 | Rs |
| 7.352033 | 3.626972e-07 | 0.0236511 | 43.79907 | Rs |
| 7.352085 | 3.62803e-07 | 0.02347316 | 42.96316 | Rs |
| 7.352085 | 3.62803e-07 | 0.02347316 | 42.96316 | Rs |
| 7.352315 | 3.628719e-07 | 0.02382268 | 40.47462 | Rs |
| 7.352406 | 3.629171e-07 | 0.02386848 | 39.6311 | Rs |
| 7.352569 | 3.629541e-07 | 0.02385792 | 38.76069 | Rs |
| 7.352754 | 3.630725e-07 | 0.02390173 | 37.94154 | Rs |
| 7.352957 | 3.630968e-07 | 0.02387485 | 37.0569 | Rs |
| 7.352604 | 3.631446e-07 | 0.02392493 | 36.18147 | Rs |
| 7.352795 | 3.63206e-07 | 0.02382911 | 35.29465 | Rs |
| 7.352921 | 3.632257e-07 | 0.02404397 | 34.43997 | Rs |
| 7.353044 | 3.632912e-07 | 0.0241165 | 33.57885 | Rs |
| 7.438004 | 1.413235e-06 | 0.0001317619 | 0.00986824 | Rs |
| 7.3129 | 5.717082e-10 | 0.0007388108 | 2.408729 | Rs |
| 7.838151 | 4.874401e-07 | 0.1588765 | 2.341069 | Rs |
| 5.139437e-07 | 5.139437e-07 | 0.003136232 | 2.611251 | Rs |
| 7.352884 | 2.777647e-09 | 0.000617399 | 2.693572 | Rs |
| 8 | 3,6803E-07 | 1,99862798 | 10,5853004 | Rs |
| 7,95297731 | 3,6194E-07 | 1,99924301 | 11,3640376 | Rs |
| 8 | 3,6156E-07 | 1,9997969 | 11,065712 | Rs |
| 7,98659444 | 0 | 1,5172E-14 | 2,79552608 | Rs |
| 7,26559971 | 3,6905E-07 | 1,99946251 | 22,5992244 | Rs |
| 7,22652631 | 3,8352E-07 | 2 | 20,9677079 | Rs |
| 7,69755674 | 3,7316E-07 | 1,99860011 | 12,7696437 | Rs |
| 7,49180818 | 3,3502E-07 | 1,99922329 | 15,3468084 | Rs |
| 8 | 3,1828E-07 | 1,99682668 | 11,3898732 | Rs |
| 7,90268462 | 3,9835E-07 | 1,99974719 | 12,8345304 | Rs |
| 8 | 3,7829E-07 | 1,99921492 | 10,9703114 | Rs |
| 8 | 3,5055E-07 | 1,99459513 | 10,5764205 | Rs |
| 8 | 3,9249E-07 | 1,99973156 | 11,9800465 | Rs |
| 7,7220613 | 3,1325E-07 | 1,9994611 | 13,0705558 | Rs |
| 7,66051809 | 3,5277E-07 | 1,99905456 | 13,4976269 | Rs |
| 7,52799909 | 3,9739E-07 | 1,99943763 | 17,1302409 | Rs |
| 7,74181425 | 2,9832E-07 | 1,99912322 | 12,4849542 | Rs |
| 7,98565219 | 3,7429E-07 | 1,99400247 | 10,7731396 | Rs |
| 7,04627265 | 3,5254E-07 | 1,99621383 | 25,4119388 | Rs |
| 8 | 3,5699E-07 | 1,99764618 | 10,9683533 | Rs |
|  | 3,6944E-07 | 1,99616257 | 18,094323 | Rs |
| 7,24691192 | 3,5052E-07 | 1,99986038 | 18,9402007 | Rs |
| 7,61558854 | 3,9701E-07 | 1,99940599 | 14,9399429 | Rs |
| 6,51846484 | 0 | 0,00576791 | 3,94889316 | Rs |
| 7,65053748 | 3,7771E-07 | 2 | 14,5333394 | Rs |
| 7,8221275 | 3,7915E-07 | 1,99850752 | 12,5062786 | Rs |
| 7,43151456 | 4,0219E-07 | 1,99945282 | 18,9995883 | Rs |
| 8 | 3,8264E-07 | 1,99952617 | 11,3474128 | Rs |
| 7,69657499 | 3,1985E-07 | 1,99995509 | 13,7474777 | Rs |
| 7,9516262 | 3,3948E-07 | 1,99617019 | 11,3169137 | Rs |
| 7,0149466 | 3,6863E-07 | 1,99999975 | 25,5598764 | Rs |
| 8 | 3,7985E-07 | 2 | 11,2481364 | Rs |
| 8 | 3,8162E-07 | 1,99766657 | 11,1357321 | Rs |
| 6,91795965 | 3,8452E-07 | 1,99948431 | 33,335806 | Rs |
| 7,99310623 | 3,1956E-07 | 1,99970814 | 10,7383923 | Rs |
| 7,92472405 | 3,6301E-07 | 1,99992002 | 11,6906398 | Rs |
| 7,84535086 | 5,3689E-09 | 1,8468E-05 | 2,95260122 | Rs |
| 8 | 3,6359E-07 | 2 | 10,6644579 | Rs |
| 7,22874241 | 3,8605E-07 | 1,99882719 | 21,3034869 | Rs |
| 8 | 3,5511E-07 | 2 | 10,9221775 | Rs |
| 7,82092633 | 1,4697E-07 | 0,25571616 | 3,55020192 | Rs |
| 8 | 3,6809E-07 | 2 | 10,800968 | Rs |
| 8 | 3,8218E-07 | 1,99661353 | 11,0610508 | Rs |
| 7,35395039 | 3,7872E-07 | 1,99823145 | 17,867332 | Rs |
| 7,26711616 | 3,5499E-07 | 1,99831308 | 18,1706291 | Rs |
| 8 | 3,1247E-07 | 1,99952956 | 10,5733476 | Rs |
| 7,99673122 | 2,2598E-07 | 0,18186157 | 3,10060052 | Rs |
| 6,56220222 | 3,8439E-07 | 2 | 82,1931716 | Rs |
| 8 | 3,431E-07 | 2 | 11,2264846 | Rs |
| 7,63830208 | 3,6619E-07 | 1,99927059 | 14,0773978 | Rs |
| 8 | 3,5363E-07 | 1,99846294 | 10,7587721 | Rs |
| 8 | 3,3357E-07 | 1,99766297 | 10,8254085 | Rs |
| 7,71445569 | 2,9953E-07 | 1,99048716 | 12,6212451 | Rs |
| 8 | 3,6053E-07 | 1,99998236 | 10,9476536 | Rs |
| 7,71979526 | 3,8762E-07 | 1,99931133 | 15,007881 | Rs |
| 7,47094923 | 3,659E-07 | 1,99984677 | 16,2767175 | Rs |
| 7,49455449 | 3,1795E-07 | 1,99922293 | 14,9507016 | Rs |
| 8 | 3,696E-07 | 1,99999817 | 10,6618784 | Rs |
| 7,62199095 | 2,2018E-07 | 1,92455734 | 48,030002 | Rs |
| 7,32728879 | 3,563E-07 | 1,92153486 | 517,937029 | Rs |
| 6,24988475 | 0 | 0 | 4,77286645 | Rs |
| 7,46680575 | 3,3411E-07 | 1,92064214 | 97,1214799 | Rs |
| 7,41396142 | 3,5565E-07 | 1,92182531 | 147,429382 | Rs |
| 7,40214616 | 3,5724E-07 | 1,92041526 | 155,213061 | Rs |
| 7,3759425 | 3,5977E-07 | 1,92006521 | 201,682896 | Rs |
| 7,37882915 | 3,5337E-07 | 1,92021498 | 196,588979 | Rs |
| 7,35641132 | 3,4652E-07 | 1,92160705 | 270,174116 | Rs |
| 7,4890588 | 3,5039E-07 | 1,91979836 | 84,5740313 | Rs |
| 7,44644307 | 3,5346E-07 | 1,91994346 | 110,455116 | Rs |
| 7,57313957 | 3,4885E-07 | 1,91812612 | 59,7309355 | Rs |
| 7,59490323 | 3,5748E-07 | 1,9173664 | 56,2698872 | Rs |
| 7,41242579 | 3,5928E-07 | 1,91907589 | 135,849043 | Rs |
| 7,45655108 | 3,5743E-07 | 1,9199001 | 102,170594 | Rs |
| 7,33877033 | 3,081E-07 | 1,92856884 | 715,36428 | Rs |
| 7,48855438 | 3,589E-07 | 1,91752217 | 83,9490649 | Rs |
| 7,31368528 | 3,6055E-07 | 1,92118807 | 879,44714 | Rs |
| 7,42649604 | 3,4093E-07 | 1,92048122 | 125,400308 | Rs |
| 7,42571775 | 3,5528E-07 | 1,91993858 | 128,600991 | Rs |
| 7,39969363 | 3,5372E-07 | 1,92141813 | 163,855976 | Rs |
| 7,38530912 | 3,5937E-07 | 1,91990674 | 182,405128 | Rs |
| 7,43765257 | 3,5481E-07 | 1,92036703 | 114,890285 | Rs |
| 7,37815703 | 3,5308E-07 | 1,92060242 | 185,039575 | Rs |
| 7,30549388 | 3,6056E-07 | 1,92176704 | 1945,13082 | Rs |
| 7,37652915 | 3,4282E-07 | 1,92210467 | 207,788972 | Rs |
| 7,4718608 | 3,5635E-07 | 1,91841041 | 91,0967636 | Rs |
| 7,53363058 | 3,5413E-07 | 1,92022711 | 72,6925771 | Rs |
| 7,30725244 | 3,6054E-07 | 1,92179845 | 1645,3022 | Rs |
| 7,44554903 | 3,5626E-07 | 1,92065487 | 113,417585 | Rs |
| 7,41197372 | 3,4321E-07 | 1,91980654 | 132,185399 | Rs |
| 7,50698915 | 3,5003E-07 | 1,92030176 | 81,0772976 | Rs |
| 7,52374607 | 3,3806E-07 | 1,91822 | 72,4700382 | Rs |
| 7,6076528 | 3,2752E-07 | 1,91872204 | 52,9944146 | Rs |
| 7,33602004 | 3,5981E-07 | 1,92199083 | 450,989591 | Rs |
| 7,52514814 | 3,4439E-07 | 1,91988338 | 71,3194193 | Rs |
| 7,51701793 | 3,4984E-07 | 1,91791427 | 75,2327265 | Rs |
| 7,42533858 | 3,4981E-07 | 1,91963235 | 122,857387 | Rs |
| 7,39070009 | 3,4661E-07 | 1,92100135 | 175,103082 | Rs |
| 7,46209913 | 3,384E-07 | 1,92009074 | 100,734237 | Rs |
| 4,86142638 | 0 | 0,06586014 | 7,68236413 | Rs |
| 7,335772 | 3,5041E-07 | 1,92216937 | 414,635233 | Rs |
| 7,53877632 | 3,5102E-07 | 1,91623255 | 64,9025701 | Rs |
| 7,34527376 | 3,5383E-07 | 1,92050869 | 302,820029 | Rs |
| 7,57485211 | 3,5229E-07 | 1,91748504 | 58,4146006 | Rs |
| 7,53298449 | 3,2607E-07 | 1,91812656 | 67,9178169 | Rs |
| 7,4906324 | 2,8862E-07 | 1,92194673 | 78,3346503 | Rs |
| 7,42280906 | 3,4765E-07 | 1,91939606 | 129,4745 | Rs |
| 7,46785863 | 3,4942E-07 | 1,91998862 | 93,8205738 | Rs |
| 7,37165475 | 3,5872E-07 | 1,91997383 | 213,073068 | Rs |
| 7,51301917 | 3,4283E-07 | 1,92024776 | 76,814496 | Rs |
| 7,35941307 | 3,5912E-07 | 1,92055881 | 236,967884 | Rs |
| 7,44027708 | 3,5693E-07 | 1,92021844 | 116,758789 | Rs |
| 7,35416489 | 3,581E-07 | 1,92075943 | 265,831038 | Rs |
| 7,33769571 | 3,5749E-07 | 1,92158541 | 418,727889 | Rs |
| 7,52139048 | 3,2004E-07 | 1,91904153 | 70,7042466 | Rs |
| 7,45465049 | 3,3604E-07 | 1,92026522 | 103,503054 | Rs |
| 7,46537646 | 3,5854E-07 | 1,92111359 | 103,097889 | Rs |
| 7,48549141 | 3,5591E-07 | 1,91874912 | 87,134527 | Rs |
| 7,42244806 | 3,3921E-07 | 1,9213689 | 135,01374 | Rs |
| 7,58009871 | 3,3191E-07 | 1,91897001 | 58,0318145 | Rs |
| 7,33363942 | 3,5742E-07 | 1,92113789 | 440,174425 | Rs |
| 7,49663468 | 3,5378E-07 | 1,91974078 | 82,1392564 | Rs |
| 7,32140757 | 3,5683E-07 | 1,92211816 | 682,442406 | Rs |
| 7,54468725 | 3,5565E-07 | 1,91760559 | 65,9010685 | Rs |
| 7,44735264 | 3,4637E-07 | 1,92178124 | 114,817753 | Rs |
| 7,36546831 | 3,4722E-07 | 1,92156437 | 241,854624 | Rs |
| 7,31938302 | 3,6041E-07 | 1,92171396 | 746,614058 | Rs |
| 7,39711639 | 3,5173E-07 | 1,92037381 | 164,56185 | Rs |
| 7,33159254 | 3,5583E-07 | 1,92075347 | 411,922149 | Rs |
| 8 | 0 | 0 | 2,95185584 | Rs |
| 7,38018728 | 3,4566E-07 | 1,92182834 | 194,85379 | Rs |
| 7,34567432 | 3,5967E-07 | 1,92060719 | 333,650976 | Rs |
| 7,5016029 | 3,5852E-07 | 1,91790083 | 79,837049 | Rs |
| 7,51161411 | 3,4495E-07 | 1,92018914 | 75,7764922 | Rs |
| 7,4178061 | 2,9822E-07 | 1,92305696 | 128,537227 | Rs |
| 7,31605479 | 3,54E-07 | 1,92139471 | 703,790417 | Rs |
| 7,50811442 | 3,567E-07 | 1,92006159 | 79,721247 | Rs |
| 7,32105899 | 3,6047E-07 | 1,92134068 | 671,586102 | Rs |
| 7,65031799 | 3,5635E-07 | 1,91544793 | 46,067215 | Rs |
| 7,39748732 | 3,4728E-07 | 1,92022887 | 155,444579 | Rs |
| 7,54084868 | 3,5613E-07 | 1,91953217 | 70,0055048 | Rs |
| 7,32154298 | 3,6052E-07 | 1,92147198 | 675,654963 | Rs |
| 7,40879322 | 3,4779E-07 | 1,92177833 | 157,865876 | Rs |
| 7,46359071 | 3,5024E-07 | 1,92040834 | 98,7188009 | Rs |
| 7,38640401 | 3,5879E-07 | 1,92019232 | 179,875084 | Rs |
| 7,57617953 | 3,5769E-07 | 1,91809135 | 60,5940573 | Rs |
| 7,40685419 | 3,5439E-07 | 1,91949444 | 142,434436 | Rs |
| 7,39176272 | 3,5986E-07 | 1,92076787 | 185,854901 | Rs |
| 7,37657308 | 3,524E-07 | 1,92096408 | 196,917971 | Rs |
| 7,30686798 | 3,6055E-07 | 1,92182778 | 1728,36374 | Rs |
| 7,81976959 | 1,5446E-07 | 0,02485313 | 3,51377962 | Rs |
| 7,33412272 | 3,6031E-07 | 1,92016278 | 389,803374 | Rs |
| 7,32703847 | 3,6028E-07 | 1,92091962 | 542,363175 | Rs |
| 7,31749654 | 3,4199E-07 | 1,92272501 | 755,267587 | Rs |
| 7,35776914 | 3,5669E-07 | 1,9197836 | 245,717987 | Rs |
| 7,50555859 | 3,5515E-07 | 1,9190623 | 78,1360876 | Rs |
| 7,4978774 | 3,3398E-07 | 1,91989897 | 83,9730674 | Rs |
| 7,40590035 | 3,381E-07 | 1,92000042 | 138,15738 | Rs |
| 7,3954696 | 3,4231E-07 | 1,92010963 | 154,362398 | Rs |
| 7,54315619 | 3,456E-07 | 1,91864147 | 65,3943496 | Rs |
| 7,55398261 | 2,5055E-07 | 1,92459574 | 64,8611098 | Rs |
| 7,39896122 | 3,5085E-07 | 1,92159668 | 165,456124 | Rs |
| 7,44528968 | 3,5783E-07 | 1,91860214 | 108,479864 | Rs |
| 7,37417977 | 3,5406E-07 | 1,92038835 | 205,888213 | Rs |
| 7,48468673 | 3,5707E-07 | 1,91850552 | 85,2976891 | Rs |
| 7,44733726 | 3,591E-07 | 1,91808904 | 106,966058 | Rs |
| 7,37918376 | 3,5928E-07 | 1,92064833 | 195,480043 | Rs |
| 7,32072151 | 3,5661E-07 | 1,92161788 | 674,900573 | Rs |
| 7,35710779 | 3,4208E-07 | 1,92178206 | 277,912173 | Rs |
| 7,41139862 | 3,356E-07 | 1,92115844 | 140,723167 | Rs |
| 7,46769294 | 3,5835E-07 | 1,91910419 | 95,8484615 | Rs |
| 6,90688738 | 0 | 0,1844862 | 3,64049174 | Rs |
| 7,45755862 | 3,567E-07 | 1,92016702 | 105,918616 | Rs |
| 7,32710504 | 3,5764E-07 | 1,92099025 | 519,309741 | Rs |
| 7,31667711 | 3,5559E-07 | 1,92183797 | 832,127157 | Rs |
| 7,32718012 | 3,5987E-07 | 1,92186591 | 578,598625 | Rs |
| 7,39105911 | 3,5701E-07 | 1,92038931 | 171,756488 | Rs |
| 7,43382261 | 3,4578E-07 | 1,91993545 | 117,603596 | Rs |
| 7,3384349 | 3,5654E-07 | 1,92143983 | 408,553861 | Rs |
| 7,3473705 | 3,5505E-07 | 1,92054999 | 291,120188 | Rs |
| 7,53392614 | 3,5835E-07 | 1,91679978 | 68,0628735 | Rs |
| 7,37990425 | 3,4892E-07 | 1,92029775 | 190,704892 | Rs |
| 7,3992414 | 3,3799E-07 | 1,92129185 | 157,295015 | Rs |
| 7,42235447 | 3,4667E-07 | 1,92163355 | 135,929474 | Rs |
| 7,32624701 | 3,6033E-07 | 1,92010631 | 464,296868 | Rs |
| 7,31472134 | 3,1555E-07 | 1,92445435 | 765,69329 | Rs |
| 7,56363074 | 3,5642E-07 | 1,91675481 | 61,2194494 | Rs |
| 7,45960711 | 3,5882E-07 | 1,91732742 | 96,6003414 | Rs |
| 7,44065972 | 3,4061E-07 | 1,92192508 | 119,850046 | Rs |
| 7,49013923 | 3,5021E-07 | 1,9198827 | 84,8212857 | Rs |
| 7,43152382 | 3,3331E-07 | 1,92062495 | 119,413327 | Rs |
| 7,57759817 | 3,5538E-07 | 1,91539079 | 57,1764438 | Rs |
| 7,41699024 | 3,5747E-07 | 1,92082145 | 140,615998 | Rs |
| 7,45582443 | 3,515E-07 | 1,9203206 | 102,948733 | Rs |
| 7,32071184 | 3,5701E-07 | 1,92185097 | 663,019628 | Rs |
| 7,37516331 | 3,5849E-07 | 1,9218524 | 223,34538 | Rs |
| 7,3591278 | 3,5467E-07 | 1,92160425 | 272,158772 | Rs |
| 7,36755633 | 3,5603E-07 | 1,92016746 | 221,100626 | Rs |
| 7,43268865 | 3,5759E-07 | 1,92201505 | 129,976887 | Rs |
| 7,42717069 | 3,5759E-07 | 1,92144787 | 134,232915 | Rs |
| 7,36172202 | 3,4456E-07 | 1,92044983 | 217,277696 | Rs |
| 7,58686358 | 3,3892E-07 | 1,91825409 | 57,446519 | Rs |
| 6,17835486 | 0 | 0,06089932 | 4,77985816 | Rs |
| 7,33771011 | 3,5512E-07 | 1,92160976 | 395,122834 | Rs |
| 7,39057023 | 3,5531E-07 | 1,91979596 | 164,659043 | Rs |
| 7,53155188 | 3,5616E-07 | 1,91796657 | 70,27556 | Rs |
| 7,49472495 | 3,508E-07 | 1,91829211 | 81,1992687 | Rs |
| 7,42313323 | 3,5441E-07 | 1,9194274 | 131,691756 | Rs |
| 7,31545795 | 3,3857E-07 | 1,92140762 | 537,591649 | Rs |
| 7,61150764 | 3,5313E-07 | 1,91752651 | 52,8391998 | Rs |
| 7,44431585 | 3,5411E-07 | 1,91941398 | 107,905773 | Rs |
| 7,38676175 | 3,4395E-07 | 1,92024219 | 173,058325 | Rs |
| 7,32041116 | 3,5798E-07 | 1,92150572 | 723,814752 | Rs |
| 7,44711949 | 3,5836E-07 | 1,91756094 | 103,515227 | Rs |
| 6,66555182 | 0 | 0 | 4,11655799 | Rs |
| 7,45301654 | 3,5676E-07 | 1,92051593 | 108,704085 | Rs |
| 7,45408644 | 3,5456E-07 | 1,91987595 | 105,835599 | Rs |
| 7,42024798 | 3,5255E-07 | 1,92225657 | 144,354439 | Rs |
| 7,30121097 | 3,5857E-07 | 1,92136356 | 1912,9891 | Rs |
| 7,41224129 | 3,375E-07 | 1,92022827 | 139,733139 | Rs |
| 7,50384161 | 3,3619E-07 | 1,91932668 | 77,0575001 | Rs |
| 7,46945032 | 3,5469E-07 | 1,91980152 | 98,9178711 | Rs |
| 7,39210875 | 3,5287E-07 | 1,91931791 | 159,860413 | Rs |
| 7,45856926 | 3,5215E-07 | 1,92050843 | 105,150642 | Rs |
| 7,44439067 | 3,4544E-07 | 1,92085589 | 115,66971 | Rs |
| 7,32705164 | 3,5717E-07 | 1,92176162 | 517,092039 | Rs |
| 7,46704859 | 3,5803E-07 | 1,92065949 | 100,682083 | Rs |
| 7,31473634 | 3,5865E-07 | 1,92177383 | 895,35464 | Rs |
| 7,48718307 | 3,4855E-07 | 1,91857088 | 84,682692 | Rs |
| 7,53972789 | 3,568E-07 | 1,91722079 | 66,9630189 | Rs |
| 7,37643947 | 3,5989E-07 | 1,92015337 | 205,252224 | Rs |
| 7,49982381 | 3,547E-07 | 1,92023179 | 82,7342856 | Rs |
| 7,53241054 | 3,5039E-07 | 1,92006356 | 71,3869656 | Rs |
| 4,76465084 | 0 | 0 | 8,58878126 | Rs |
| 7,34786752 | 3,5758E-07 | 1,92029292 | 302,894597 | Rs |
| 7,57155973 | 3,4861E-07 | 1,9180445 | 59,5508347 | Rs |
| 8 | 0 | 0 | 2,88944333 | Rs |
| 7,54809307 | 3,463E-07 | 1,91824618 | 65,1115469 | Rs |
| 7,49583614 | 3,4826E-07 | 1,92010602 | 84,4859597 | Rs |
| 7,4443919 | 3,5619E-07 | 1,92158991 | 121,192089 | Rs |
| 7,30544047 | 3,6047E-07 | 1,92181326 | 1827,23475 | Rs |
| 7,58722208 | 3,4279E-07 | 1,91772148 | 55,3038706 | Rs |
| 7,57133885 | 3,4582E-07 | 1,91763018 | 60,1253155 | Rs |
| 7,31337177 | 3,3564E-07 | 1,92326519 | 688,085532 | Rs |
| 7,67679116 | 3,2056E-07 | 1,91767982 | 43,3456244 | Rs |
| 7,37346369 | 3,4866E-07 | 1,92249666 | 232,126434 | Rs |
| 7,59051074 | 3,4133E-07 | 1,91580347 | 54,061572 | Rs |
| 7,39239491 | 3,5689E-07 | 1,92016597 | 175,955764 | Rs |
| 7,47291493 | 3,3398E-07 | 1,9212865 | 93,4669356 | Rs |
| 7,48342815 | 3,4973E-07 | 1,92080428 | 89,8568586 | Rs |
| 7,50568431 | 3,4627E-07 | 1,91998571 | 80,4946976 | Rs |
| 7,3770355 | 3,5253E-07 | 1,92208864 | 217,669381 | Rs |
| 7,4858547 | 3,5755E-07 | 1,91778312 | 84,5780581 | Rs |
| 7,48129126 | 3,5456E-07 | 1,918786 | 87,2559523 | Rs |
| 7,33714594 | 3,5769E-07 | 1,92140424 | 415,851255 | Rs |
| 7,48998314 | 3,5851E-07 | 1,91889365 | 85,846733 | Rs |
| 7,48839716 | 3,5276E-07 | 1,91957907 | 86,5002736 | Rs |
| 7,44520125 | 3,5935E-07 | 1,92091618 | 119,098678 | Rs |
| 7,44380223 | 3,5178E-07 | 1,9205718 | 114,644459 | Rs |
| 7,94565515 | 1,3498E-07 | 0 | 3,37148371 | Rs |
| 7,39966917 | 3,546E-07 | 1,91977489 | 158,761109 | Rs |
| 7,41883811 | 3,536E-07 | 1,91837361 | 124,400011 | Rs |
| 7,51510788 | 3,4783E-07 | 1,92099503 | 76,810713 | Rs |
| 6,89476708 | 0 | 0,00729296 | 3,5148182 | Rs |
| 7,58744224 | 3,503E-07 | 1,91739941 | 55,9488016 | Rs |
| 7,52429218 | 3,4656E-07 | 1,92060043 | 74,8143009 | Rs |
| 5,33862946 | 0 | 0 | 5,1242047 | Rs |
| 7,39496966 | 3,6E-07 | 1,91887756 | 161,761915 | Rs |
| 7,32298942 | 3,4817E-07 | 1,92059854 | 430,542398 | Rs |
| 7,48890825 | 3,4685E-07 | 1,91949258 | 85,664523 | Rs |
| 7,4194654 | 3,4525E-07 | 1,92035023 | 135,504166 | Rs |
| 7,31586773 | 3,5977E-07 | 1,92147471 | 765,674821 | Rs |
| 7,3355924 | 3,5067E-07 | 1,92188347 | 416,153002 | Rs |
| 7,57661139 | 3,5302E-07 | 1,91716064 | 59,6389485 | Rs |
| 7,49044349 | 3,4818E-07 | 1,9187001 | 83,534247 | Rs |
| 7,3270221 | 3,5556E-07 | 1,92119345 | 501,281232 | Rs |
| 7,48202869 | 3,5799E-07 | 1,91894457 | 89,1230429 | Rs |
| 7,31503239 | 3,5356E-07 | 1,92133898 | 756,672118 | Rs |
| 7,17288857 | 1,9079E-07 | 0,0468795 | 38,8598546 | Rs |
| 7,25661664 | 3,4379E-07 | 0,02223502 | 29,7168454 | Rs |
| 7,3132258 | 3,5424E-07 | 0,02756586 | 27,3506835 | Rs |
| 7,33539187 | 2,6722E-07 | 0,02375893 | 23,7032871 | Rs |
| 7,32809174 | 1,206E-07 | 0,04191423 | 24,1647387 | Rs |
| 7,36745059 | 3,2783E-07 | 0,04519723 | 27,8165223 | Rs |
| 7,40946309 | 1,6948E-07 | 0,03696178 | 21,2452534 | Rs |
| 7,32963762 | 2,8844E-07 | 0,02597662 | 25,5613945 | Rs |
| 7,07472891 | 2,802E-07 | 0,0360439 | 58,2972104 | Rs |
| 7,28455984 | 2,8984E-07 | 0,05622856 | 32,8209453 | Rs |
| 7,14040827 | 3,8303E-07 | 0,03543419 | 46,3812868 | Rs |
| 7,30949917 | 3,0965E-07 | 0,02077912 | 23,8221278 | Rs |
| 7,45270314 | 1,2259E-07 | 0,03789046 | 19,1397333 | Rs |
| 7,30033947 | 2,8537E-07 | 0,03438582 | 27,5518867 | Rs |
| 7,33994887 | 3,4359E-07 | 0,02427928 | 24,9977622 | Rs |
| 7,32666685 | 2,7552E-07 | 0,03125466 | 24,8825212 | Rs |
| 7,20177087 | 3,0503E-07 | 0,03273264 | 34,1628092 | Rs |
| 7,3916205 | 2,5331E-07 | 0,0057871 | 9,99722693 | Rs |
| 7,39642586 | 3,5086E-07 | 0,05826739 | 10,6399254 | Rs |
| 6,94927663 | 2,0688E-07 | 0,1414321 | 18,9293938 | Rs |
| 7,38189742 | 2,4491E-07 | 0,0362203 | 9,51358341 | Rs |
| 7,22066232 | 4,032E-07 | 0,07718688 | 13,5317538 | Rs |
| 7,03528833 | 3,301E-07 | 0,06197678 | 15,3898626 | Rs |
| 7,39130641 | 3,6994E-07 | 0,05612194 | 11,2037719 | Rs |
| 7,17474544 | 1,7579E-07 | 0,10674973 | 13,9995354 | Rs |
| 7,48764822 | 1,2995E-07 | 0,12097765 | 10,0926424 | Rs |
| 6,70870602 | 3,24E-07 | 0,14826133 | 30,6322076 | Rs |
| 7,33807109 | 3,6197E-07 | 0,05802029 | 10,5934452 | Rs |
| 4,62634634 | 0 | 0 | 7,73455109 | Rs |
| 7,05894345 | 3,1985E-07 | 0,10263486 | 15,9312371 | Rs |
| 7,3357895 | 3,1344E-07 | 0,03198813 | 9,89379166 | Rs |
| 7,25237171 | 4,0387E-07 | 0,0949355 | 13,8734193 | Rs |
| 7,19991392 | 3,2268E-07 | 0,10830248 | 13,325357 | Rs |
| 7,0846925 | 4,1479E-07 | 0,03048094 | 14,7143966 | Rs |
| 5,63207464 | 0 | 0 | 6,35566469 | Rs |
| 5,69641237 | 0 | 0,00505656 | 6,34740273 | Rs |
| 7,03594958 | 4,1806E-07 | 0,13904191 | 19,8524705 | Rs |
| 6,5847 | 3,1524E-07 | 0,08434984 | 24,2861477 | Rs |
| 7,16467436 | 1,8542E-07 | 0,11749875 | 13,2289811 | Rs |
| 6,93843164 | 3,2558E-07 | 0,04377272 | 14,762553 | Rs |
| 7,36577307 | 3,4083E-07 | 0,0528122 | 9,71435355 | Rs |
| 4,88786807 | 0 | 0,01219828 | 9,58440654 | Rs |
| 7,37863951 | 3,3131E-07 | 0,06694614 | 10,8278258 | Rs |
| 7,395555 | 2,7307E-07 | 0,05261228 | 10,0883476 | Rs |
| 7,37516833 | 2,436E-07 | 0,04602804 | 9,88779787 | Rs |
| 7,23331321 | 3,8397E-07 | 0,04262563 | 12,5984677 | Rs |
| 7,61410828 | 2,517E-07 | 0 | 8,05543822 | Rs |
| 4,77875189 | 0 | 0 | 9,72920252 | Rs |
| 7,09291848 | 2,5004E-07 | 0,07698254 | 13,9933924 | Rs |
| 7,26411812 | 1,3164E-07 | 0,06288478 | 10,5654236 | Rs |
| 7,30976787 | 1,6178E-07 | 0,07659111 | 11,303315 | Rs |
| 4,99745509 | 0 | 0,11309154 | 9,18353393 | Rs |
| 6,90250872 | 3,1966E-07 | 0,10194283 | 18,172631 | Rs |
| 7,11564892 | 3,9078E-07 | 0,07909937 | 14,1190488 | Rs |
| 7,00020063 | 1,3352E-07 | 0,07098933 | 14,1550966 | Rs |
| 6,62286229 | 2,2947E-07 | 0,10377703 | 28,3375021 | Rs |
| 7,24885272 | 2,5462E-07 | 0,08191715 | 12,1080404 | Rs |
| 6,76159973 | 4,1655E-07 | 0,10067133 | 24,9630262 | Rs |
| 7.3129 | 5.717082e-10 | 0.0007388108 | 2.408729 | Rs |
| 7.838151 | 4.874401e-07 | 0.1588765 | 2.341069 | Rs |
| 5.139437e-07 | 5.139437e-07 | 0.003136232 | 2.611251 | Rs |
| 7.352884 | 2.777647e-09 | 0.000617399 | 2.693572 | Rs |
| 7,3053565 | 3,6062E-07 | 1,92147286 | 1767,34695 | shunt |
| 7,31049725 | 3,5807E-07 | 1,92100572 | 1070,07785 | shunt |
| 7,30075937 | 3,5916E-07 | 1,92139729 | 2000 | shunt |
| 7,30512838 | 3,6007E-07 | 1,92170478 | 1602,03763 | shunt |
| 7,30501153 | 3,6049E-07 | 1,9218205 | 1976,19222 | shunt |
| 7,30815643 | 3,6001E-07 | 1,92157555 | 1373,59954 | shunt |
| 7,31047213 | 3,6048E-07 | 1,92180725 | 1310,31121 | shunt |
| 7,31699014 | 3,6082E-07 | 1,9224903 | 1502,0094 | shunt |
| 7,30633202 | 3,6001E-07 | 1,92182022 | 1813,71122 | shunt |
| 7,3051415 | 3,6052E-07 | 1,92178252 | 1958,13517 | shunt |
| 7,30656781 | 3,6048E-07 | 1,9218045 | 1756,75226 | shunt |
| 7,30443073 | 3,605E-07 | 1,92158819 | 1940,89344 | shunt |
| 7,31811211 | 3,603E-07 | 1,92242716 | 921,850876 | shunt |
| 7,30630829 | 3,5884E-07 | 1,9215288 | 1832,56884 | shunt |
| 7,3069294 | 3,603E-07 | 1,92177388 | 1636,5274 | shunt |
| 7,3061335 | 3,6049E-07 | 1,92156875 | 1571,33315 | shunt |
| 7,30559803 | 3,6041E-07 | 1,92162968 | 1559,46282 | shunt |
| 7,30463035 | 3,6053E-07 | 1,92163259 | 1903,67177 | shunt |
| 7,30526172 | 3,6055E-07 | 1,92172697 | 1928,88448 | shunt |
| 7,30691494 | 3,6015E-07 | 1,92173552 | 1567,68387 | shunt |
| 7,31017157 | 3,5975E-07 | 1,92402389 | 1869,70536 | shunt |
| 7,3048667 | 3,6049E-07 | 1,92166338 | 1816,97053 | shunt |
| 7,30763199 | 3,6019E-07 | 1,92206209 | 1763,29932 | shunt |
| 7,30793739 | 3,6008E-07 | 1,9217867 | 1620,98904 | shunt |
| 7,30563515 | 3,6022E-07 | 1,92148288 | 1834,1579 | shunt |
| 7,31116175 | 3,6114E-07 | 1,92098871 | 1477,69635 | shunt |
| 7,31178696 | 3,5769E-07 | 1,92224607 | 1170,57136 | shunt |
| 7,30523035 | 3,6053E-07 | 1,92149118 | 1690,69139 | shunt |
| 7,30580464 | 3,6054E-07 | 1,92184747 | 1931,18554 | shunt |
| 7,30568281 | 3,6054E-07 | 1,92166086 | 1784,09233 | shunt |
| 7,30482925 | 3,6038E-07 | 1,92159197 | 1738,11802 | shunt |
| 7,31036266 | 3,6079E-07 | 1,92160965 | 1584,71273 | shunt |
| 7,30477609 | 3,6057E-07 | 1,92190206 | 1803,58261 | shunt |
| 7,31064427 | 3,6045E-07 | 1,92158373 | 1127,56818 | shunt |
| 7,30586518 | 3,606E-07 | 1,92172677 | 1884,84603 | shunt |
| 7,30737829 | 3,603E-07 | 1,92216522 | 1735,23415 | shunt |
| 7,30733981 | 3,6032E-07 | 1,92184783 | 1546,82202 | shunt |
| 7,30646387 | 3,6058E-07 | 1,92175409 | 1801,04283 | shunt |
| 7,30656766 | 3,6056E-07 | 1,92170185 | 1776,32266 | shunt |
| 7,3025024 | 3,6001E-07 | 1,92161678 | 1660,91954 | shunt |
| 7,3063964 | 3,5996E-07 | 1,92197762 | 1943,88656 | shunt |
| 7,30620661 | 3,6059E-07 | 1,92183455 | 1905,45095 | shunt |
| 7,30884062 | 3,5908E-07 | 1,92277832 | 1844,16917 | shunt |
| 7,30832278 | 3,6051E-07 | 1,92163331 | 1394,99391 | shunt |
| 7,30572106 | 3,606E-07 | 1,92153488 | 1730,94727 | shunt |
| 7,30448103 | 3,6062E-07 | 1,92143078 | 1692,06552 | shunt |
| 7,30673264 | 3,6047E-07 | 1,92173505 | 1634,92673 | shunt |
| 7,30646301 | 3,6025E-07 | 1,92214463 | 1442,65187 | shunt |
| 7,30720978 | 3,6005E-07 | 1,92164761 | 1826,47539 | shunt |
| 7,3254816 | 3,5006E-07 | 1,92506132 | 933,916844 | shunt |
| 7,29791721 | 3,4671E-07 | 1,92256761 | 2000 | shunt |
| 7,30729985 | 3,6038E-07 | 1,92214432 | 1997,98099 | shunt |
| 7,30768314 | 3,605E-07 | 1,92198911 | 1651,94655 | shunt |
| 8 | 0,00005 | 0.0881147 | 2000 | shunt |
| 8 | 0,00005 | 0.175583 | 2000 | shunt |
| 8 | 0,00005 | 0.2629213 | 2000 | shunt |
| 8 | 0,00005 | 0.3502414 | 2000 | shunt |
| 8 | 0,00005 | 0.4375141 | 2000 | shunt |
| 8 | 0,00005 | 0.4375141 | 2000 | shunt |
| 8 | 0,00005 | 0.6117545 | 2000 | shunt |
| 8 | 0,00005 | 0.6986576 | 2000 | shunt |
| 8 | 2.950768e-05 | 0.7901852 | 1999.964 | shunt |
| 7.999929 | 4.803105e-06 | 0.8927745 | 2000 | shunt |
| 7.999998 | 1.573107e-05 | 0.9705869 | 1998.749 | shunt |
| 7.999997 | 1.346027e-05 | 1.059676 | 1999.199 | shunt |
| 7.999992 | 4.227685e-06 | 1.159148 | 1966.421 | shunt |
| 7.999813 | 5.103767e-06 | 1.24516 | 1924.836 | shunt |
| 8 | 9.396681e-06 | 1.325529 | 1887.927 | shunt |
| 7.997519 | 2.201355e-07 | 1.540009 | 1930.831 | shunt |
| 7.999928 | 3.803851e-07 | 1.447246 | 2000 | shunt |
| 7.999101 | 9.116514e-07 | 1.614765 | 1439.632 | shunt |
| 7.997866 | 1.005584e-06 | 1.700772 | 1714.112 | shunt |
| 8 | 2.280533e-07 | 1.804688 | 1958.255 | shunt |
| 7.999503 | 1.342044e-07 | 1.896345 | 2000 | shunt |
| 8 | 7.214593e-09 | 2 | 1956.153 | shunt |
| 7,07176214 | 2,556E-07 | 0,9454195 | 5,14454948 | shad |
| 7,07211512 | 6,0384E-08 | 0,09605881 | 3,77308199 | shad |
| 7,01693548 | 1,5121E-07 | 0,48558801 | 4,35683831 | shad |
| 7,01584558 | 1,8835E-07 | 0,87360998 | 5,37842375 | shad |
| 7,15830554 | 1,6751E-07 | 0,95582924 | 5,13640928 | shad |
| 7,31449904 | 1,5906E-07 | 0,9941829 | 4,86684237 | shad |
| 7,50824475 | 1,388E-07 | 0,82687226 | 4,20233233 | shad |
| 7,03966188 | 3,7381E-08 | 0,28913637 | 3,82508085 | shad |
| 7,11958575 | 1,4453E-07 | 0,57470414 | 4,27997868 | shad |
| 7,14608535 | 4,3578E-08 | 0,12071765 | 3,4502477 | shad |
| 7,43429583 | 2,1421E-07 | 0,85455696 | 4,27206979 | shad |
| 7,16352603 | 2,4371E-07 | 1,0270117 | 5,66638685 | shad |
| 7,68427914 | 8,1533E-08 | 0,41296569 | 3,45244272 | shad |
| 7,14836988 | 1,5947E-07 | 0,43704607 | 4,24788598 | shad |
| 7,19904925 | 2,8838E-08 | 0,11383967 | 3,62915112 | shad |
| 7,16377824 | 2,1312E-07 | 0,84316048 | 4,75708396 | shad |
| 7,37101695 | 1,8579E-07 | 0,74948422 | 4,52400682 | shad |
| 7,37101695 | 1,8579E-07 | 0,74948422 | 4,52400682 | shad |
| 7,04544184 | 2,5386E-07 | 0,61835395 | 5,07259085 | shad |
| 7,04544184 | 2,5386E-07 | 0,61835395 | 5,07259085 | shad |
